# Supplementary material for: Design, synthesis,in silicomolecular modelling studies and biological evaluation of novel indole-thiazolidinedione hybrid analogues as potential pancreatic lipase inhibitors
Source: Royal Society of Chemistry journal article supplement (doi:10.1039/d0nj05649a), 2020-12-14

**Title Page**

**Title:**

**Design, synthesis, *in silico* molecular modelling studies and biological evaluation of novel indole-thiazolidinedione hybrid analogues as potential pancreatic lipase inhibitors**

**Authors and Affiliations:**

Ginson George, Prashant S Auti and Atish T. Paul\*

*Laboratory of Natural Product Chemistry, Department of Pharmacy, Birla Institute of Technology and Science, Pilani (BITS Pilani), Pilani Campus, Pilani - 333 031, Rajasthan, India.*

\*Corresponding author

**Present address of the corresponding author:**

Laboratory of Natural Product Chemistry, Department of Pharmacy, Birla Institute of Technology and Science, Pilani (BITS Pilani), Pilani Campus, Pilani - 333 031, Rajasthan, India

Email ID: [atish.paul@pilani.bits-pilani.ac.in](mailto:atish.paul@pilani.bits-pilani.ac.in)

7a

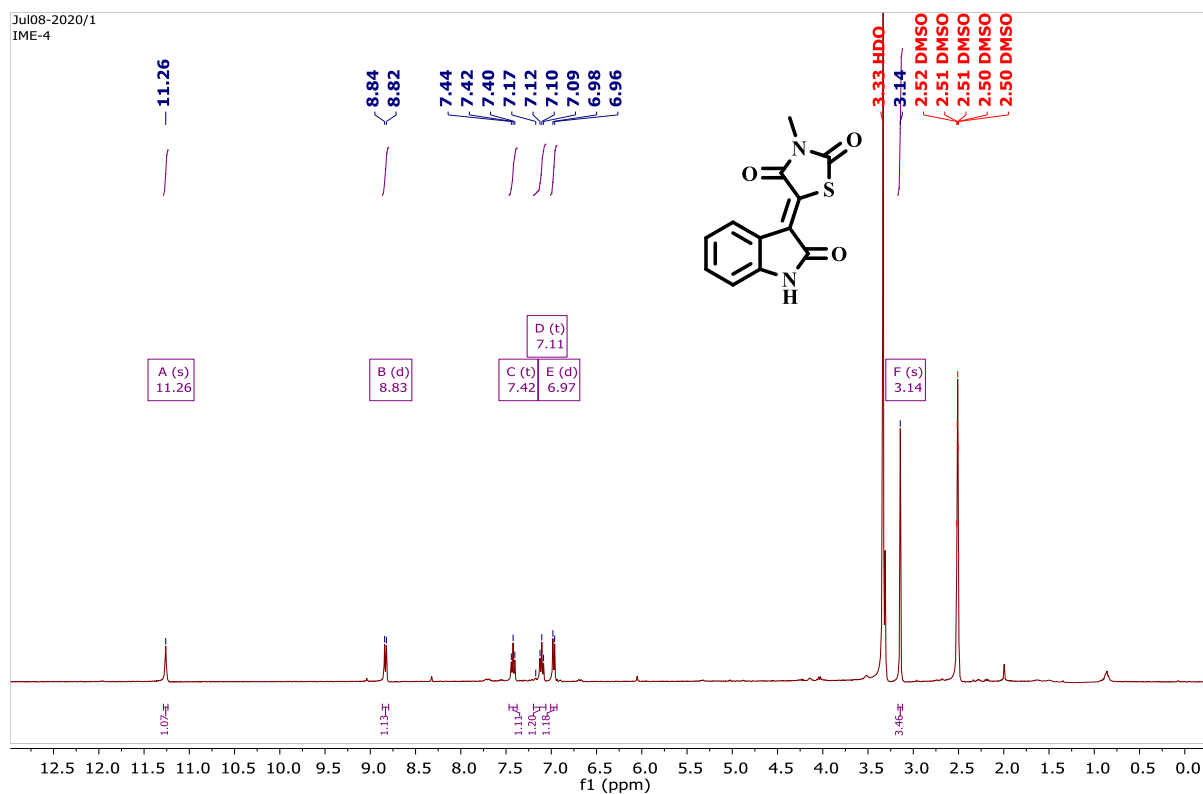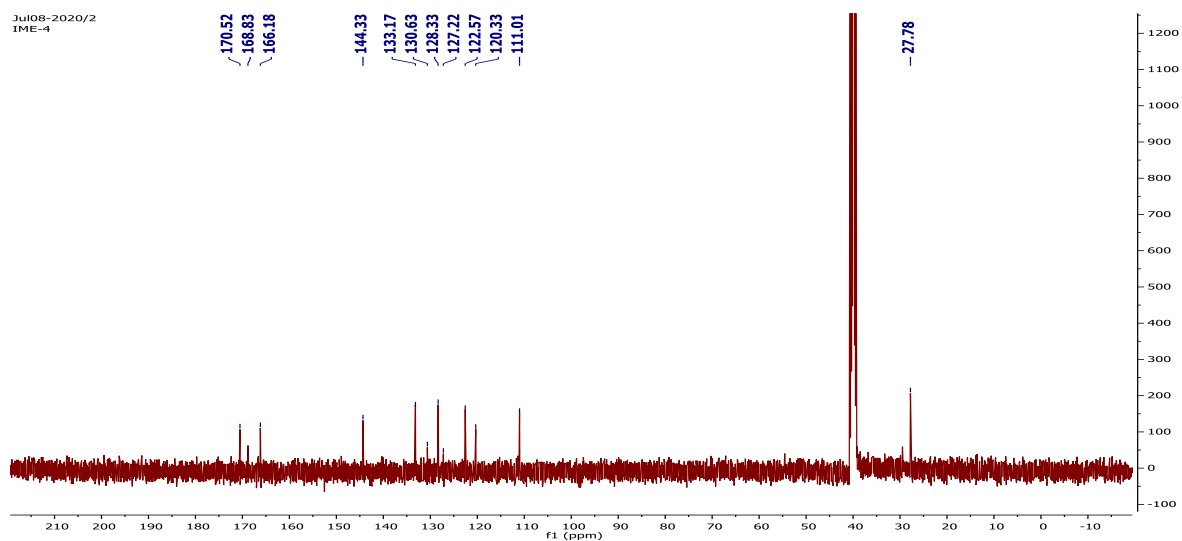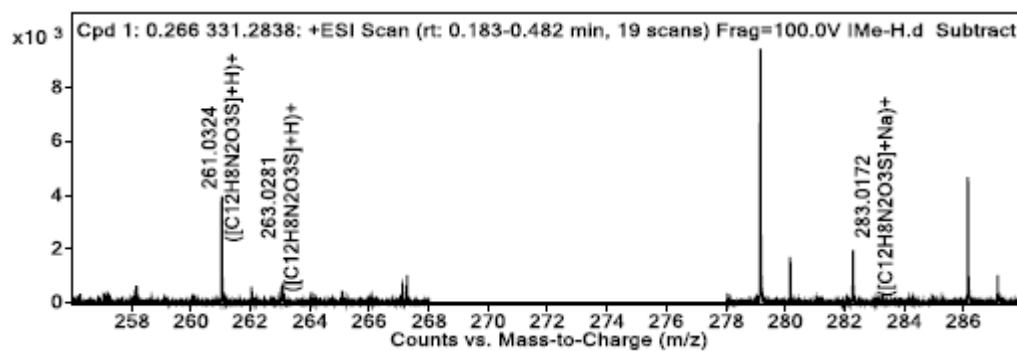

7b

Jun24-2020/4  
1ME-ME

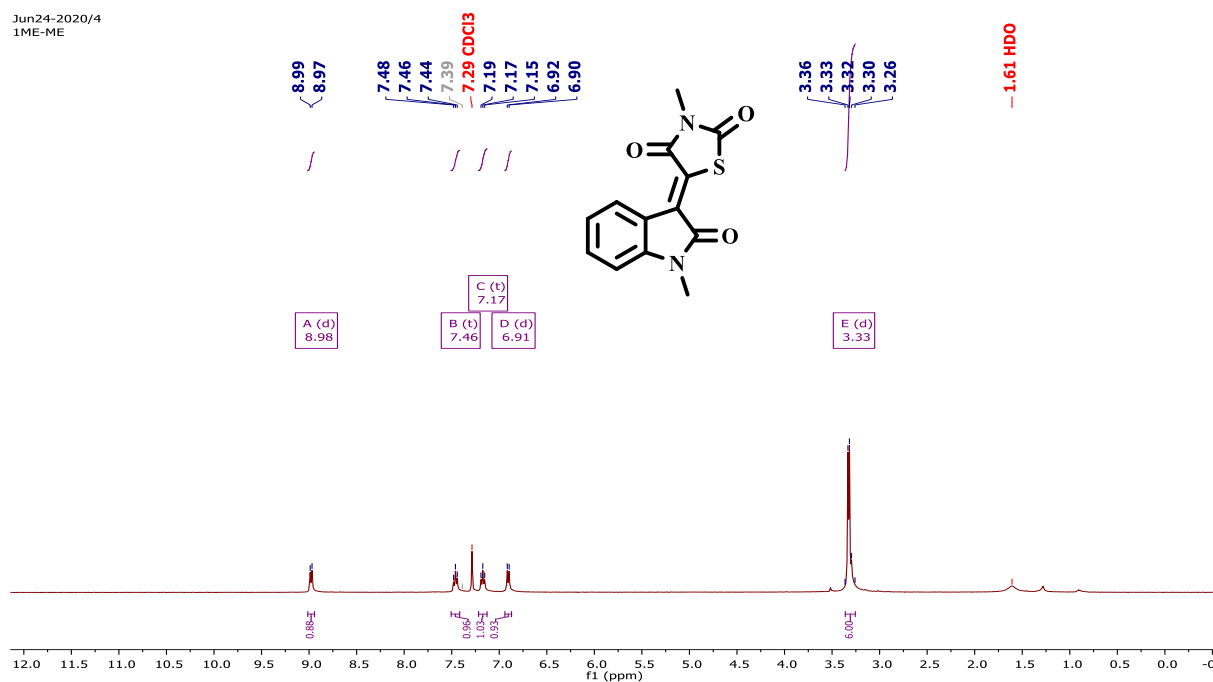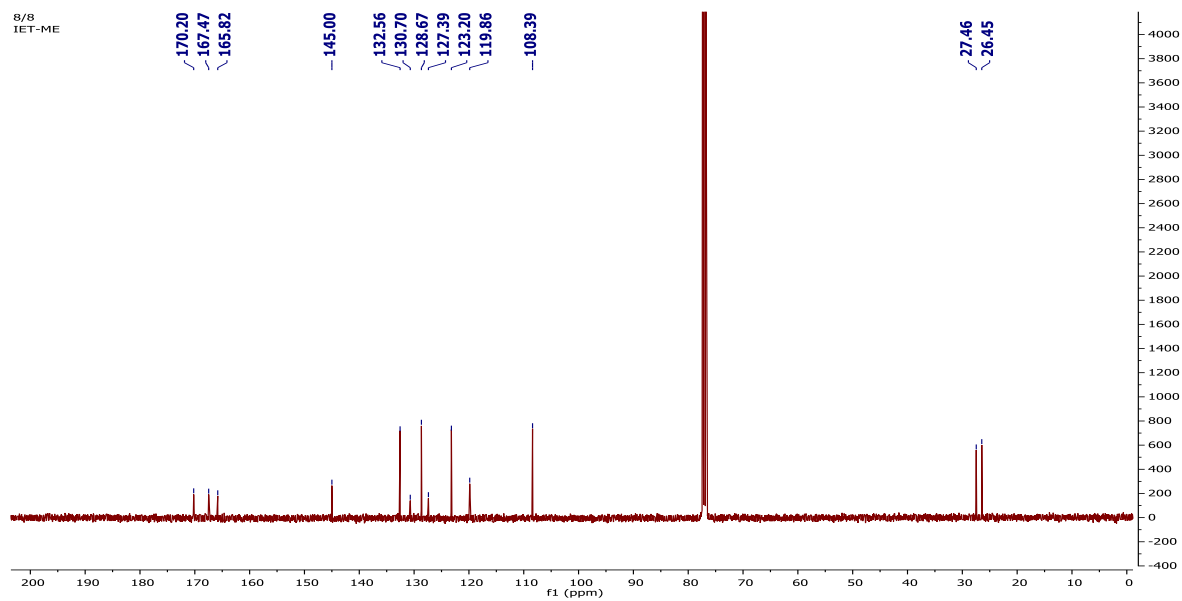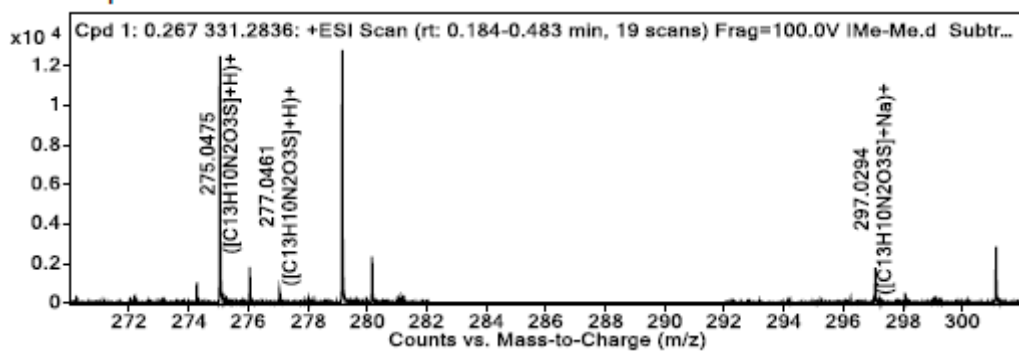

7c

Jun24-2020/1  
ME-EE

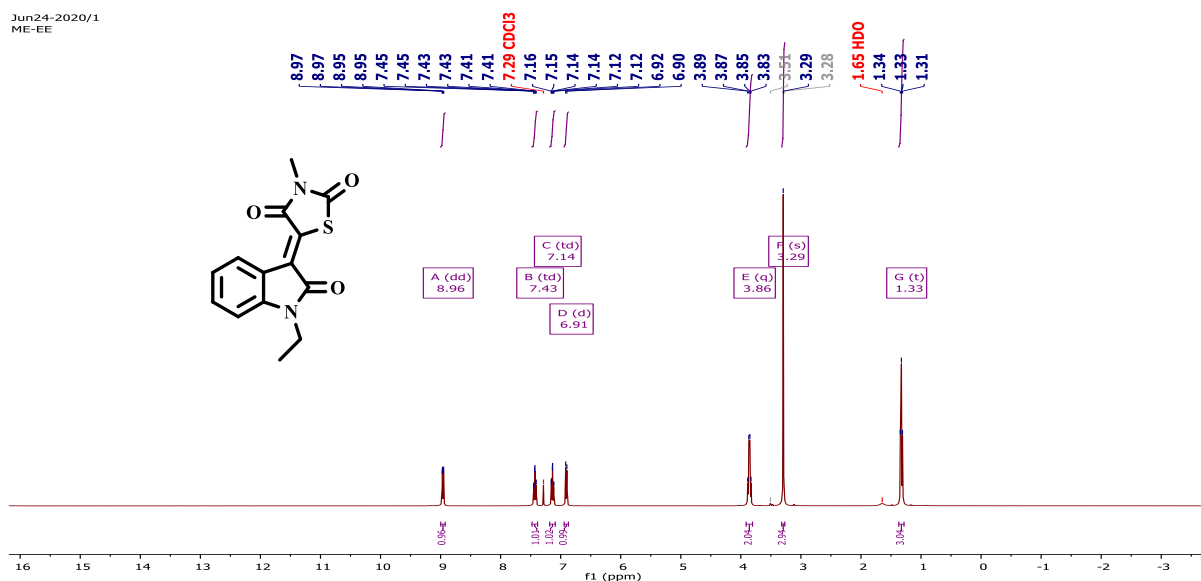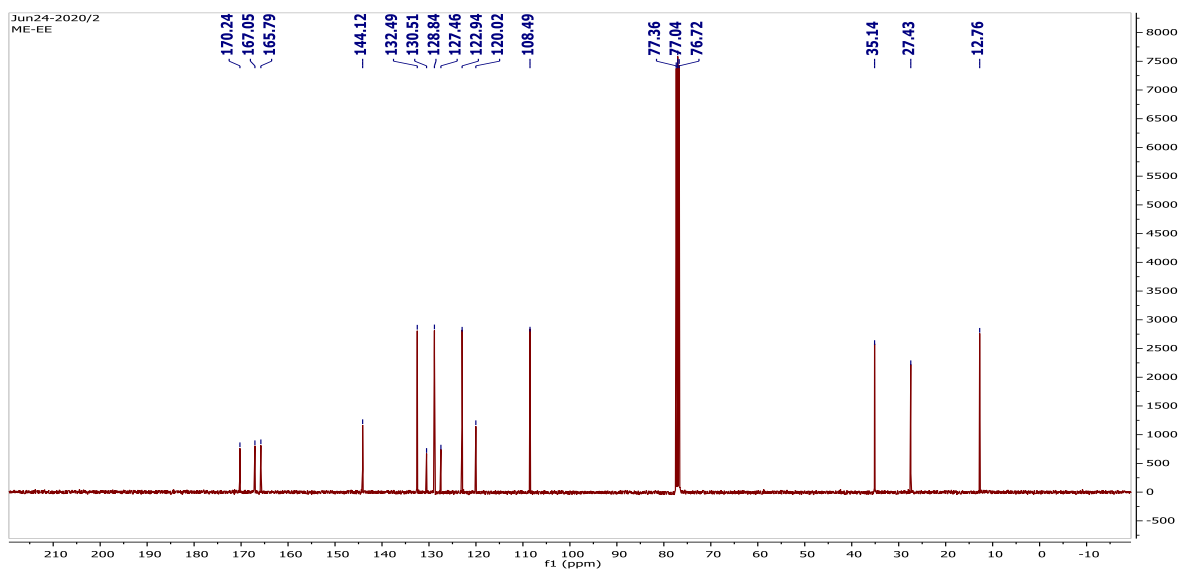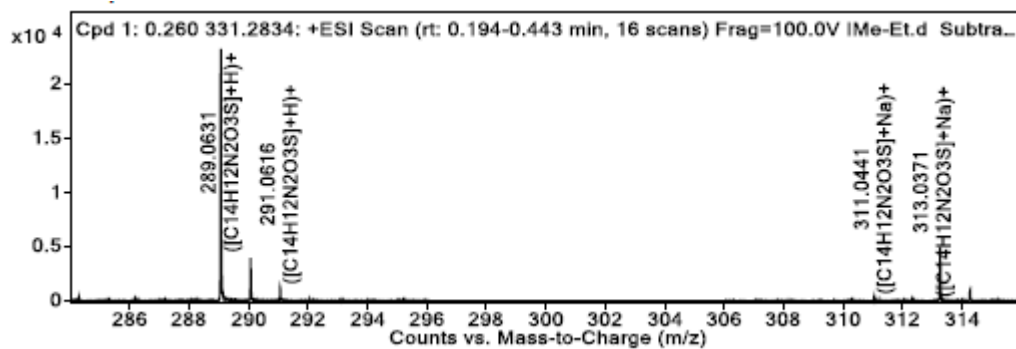

Jun25-2020/3  
IME-BE

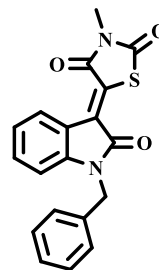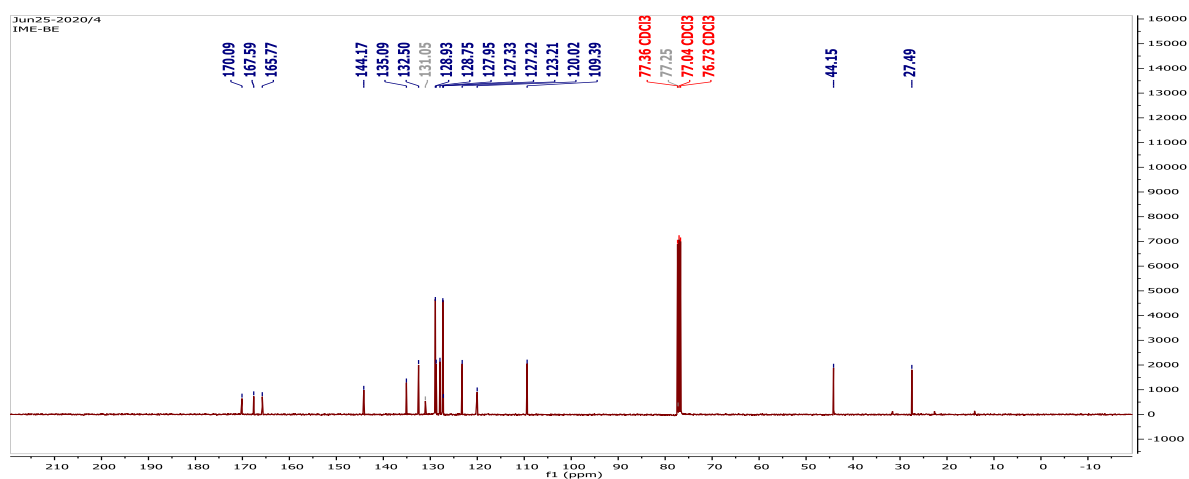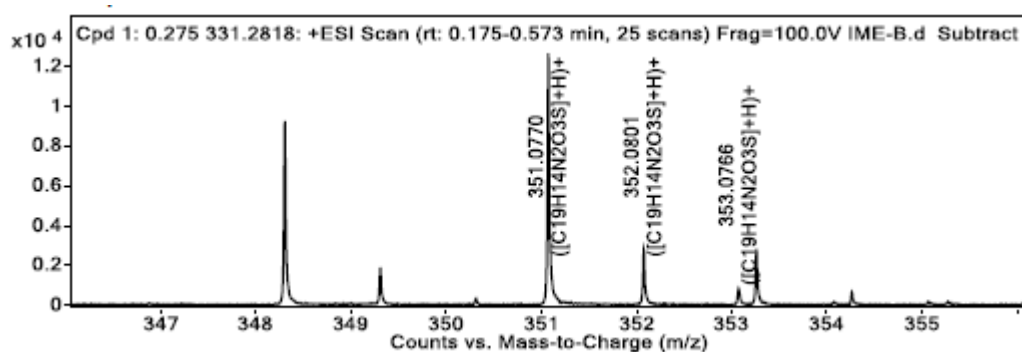

7e

Jul10-2020/3  
IME-CL

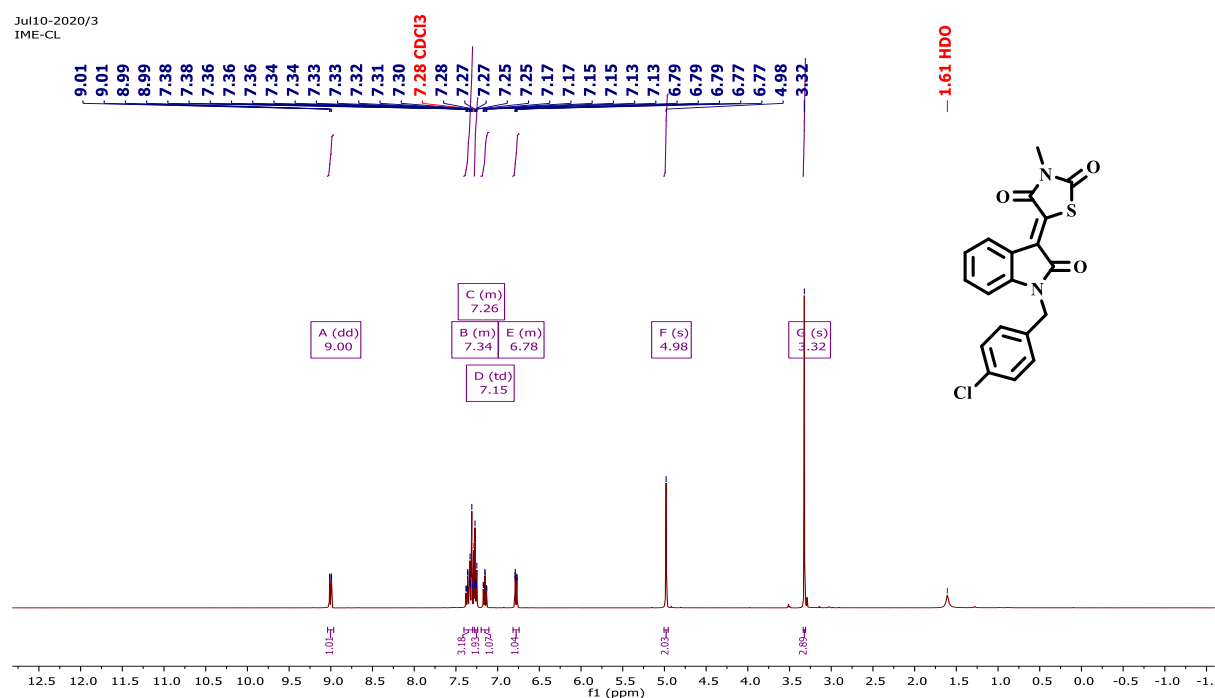

Jul10-2020/4  
IME-CL

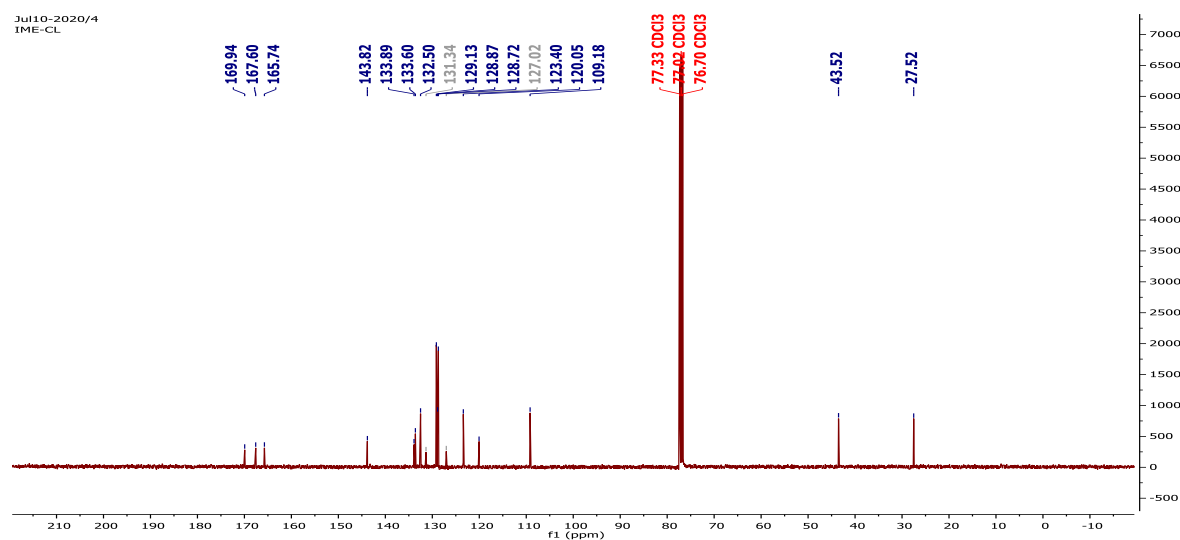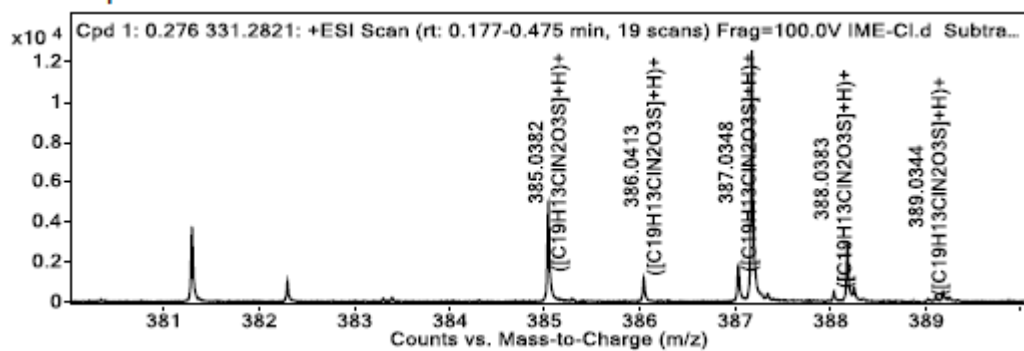

Jun29-2020/1  
IME-BR

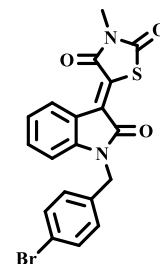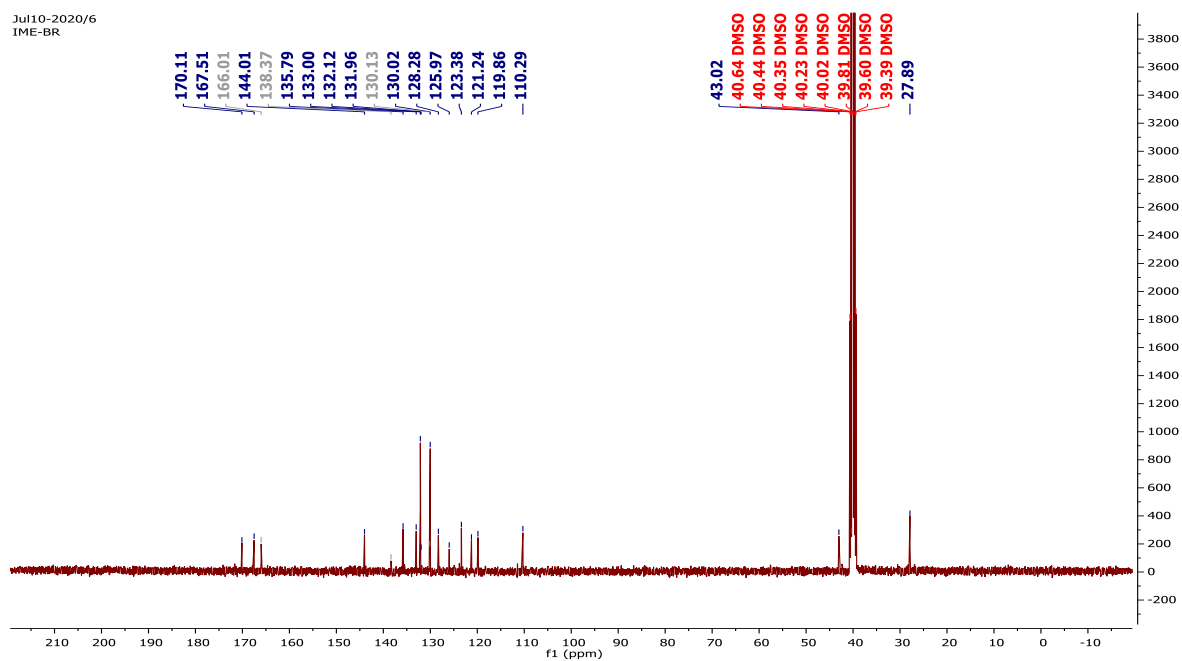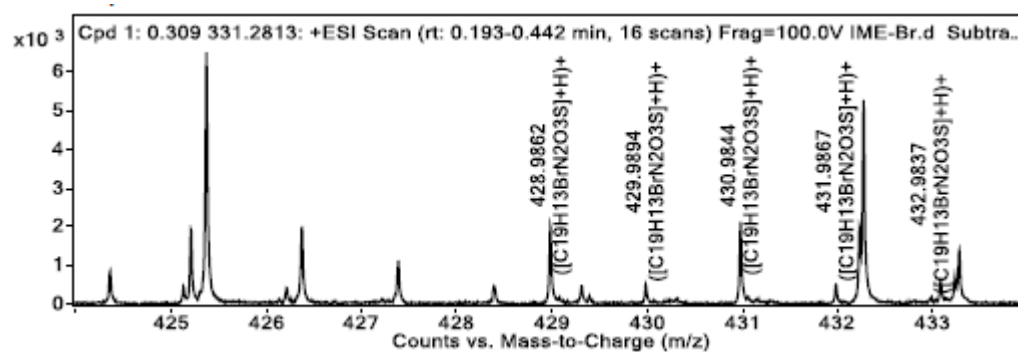

7g

Jul02-2020/3  
IME-NO

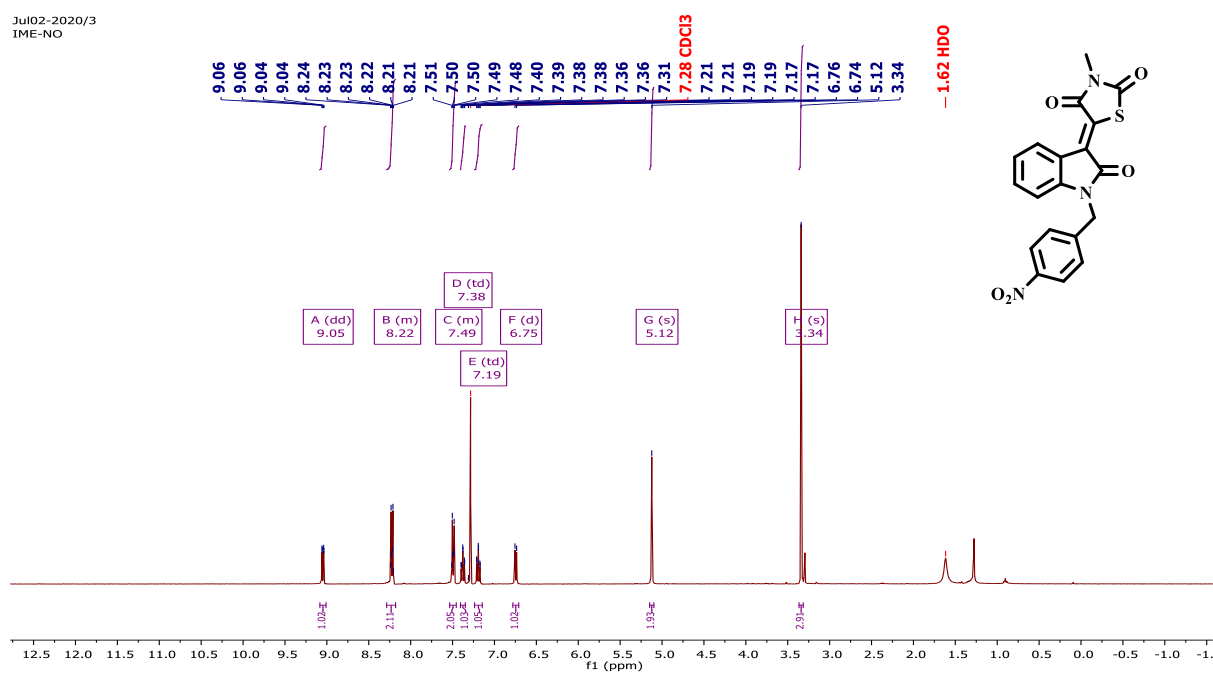

Jul02-2020/8  
IME-NO

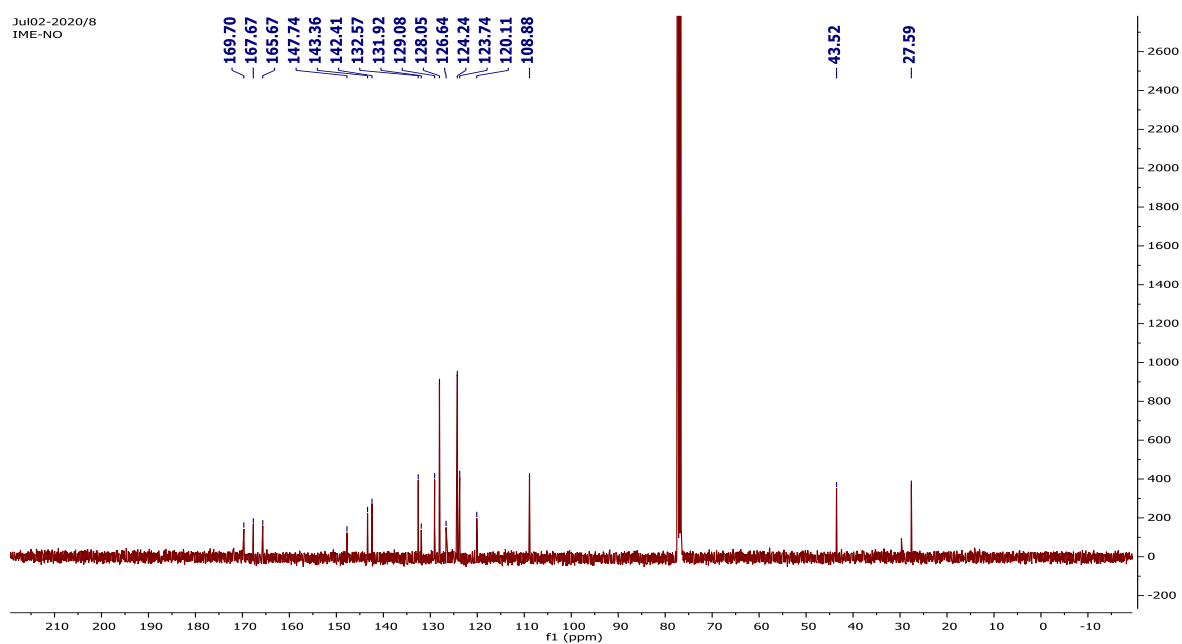

### MS Zoomed Spectrum

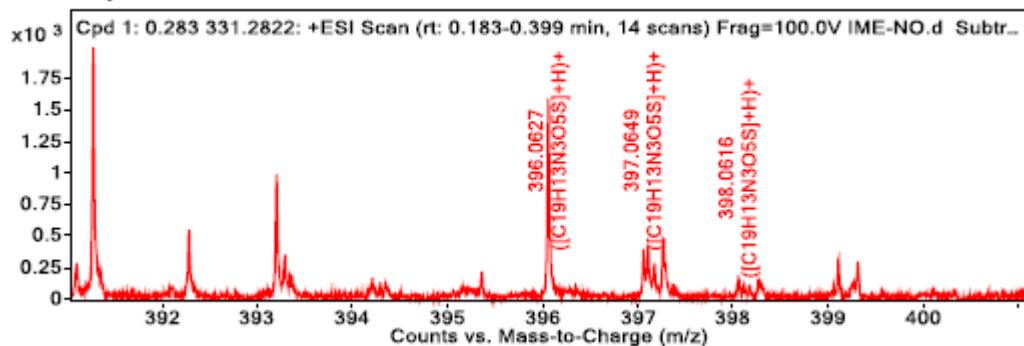

7h

Jul10-2020/1  
IB-H

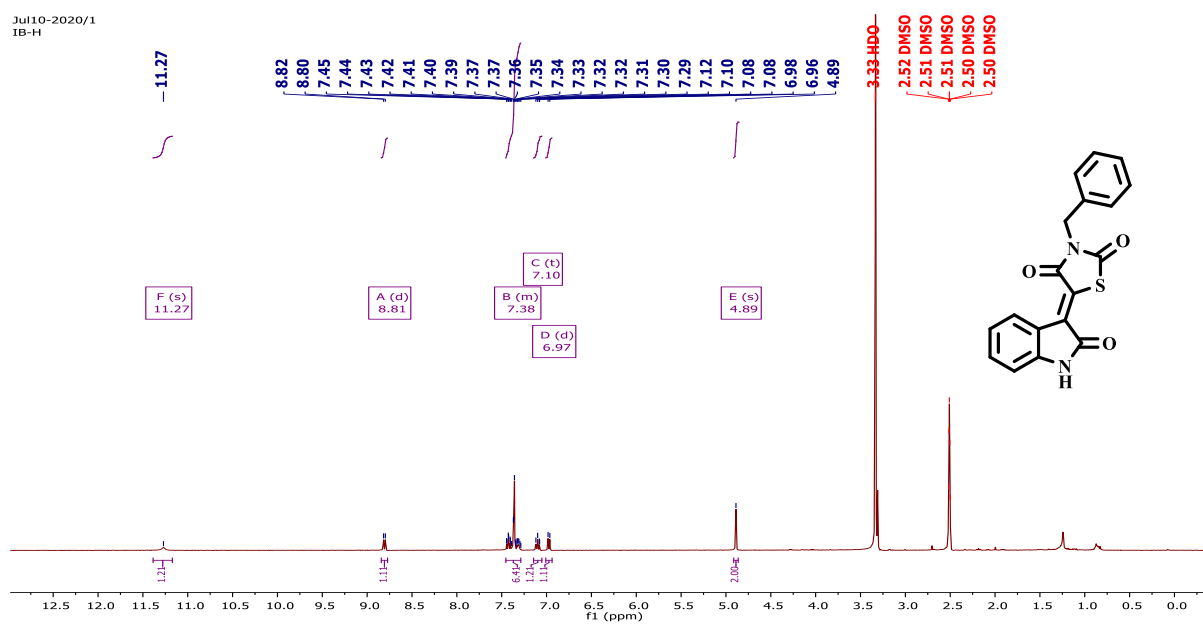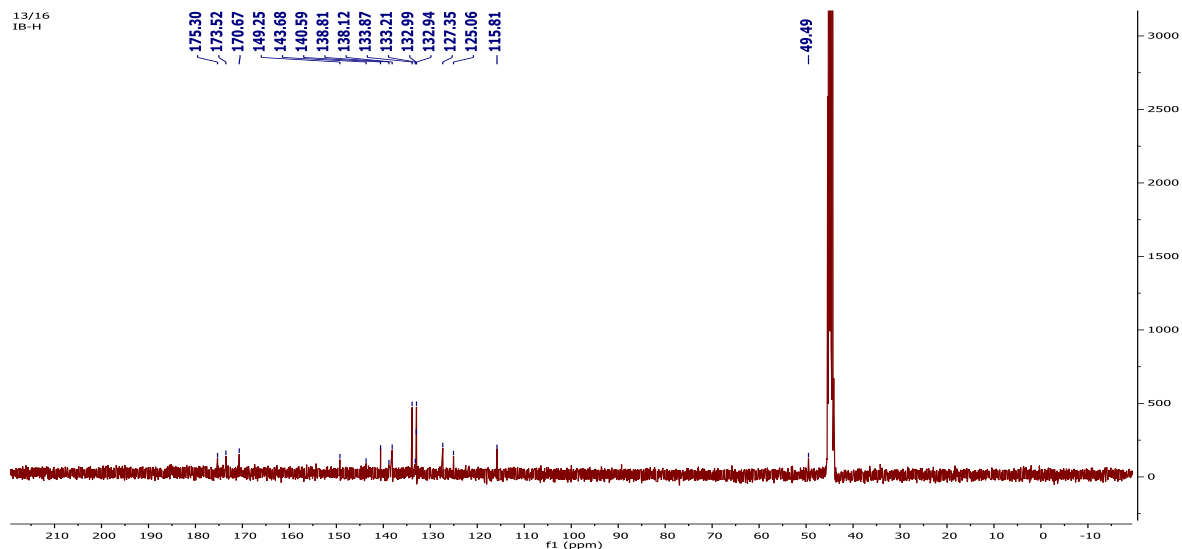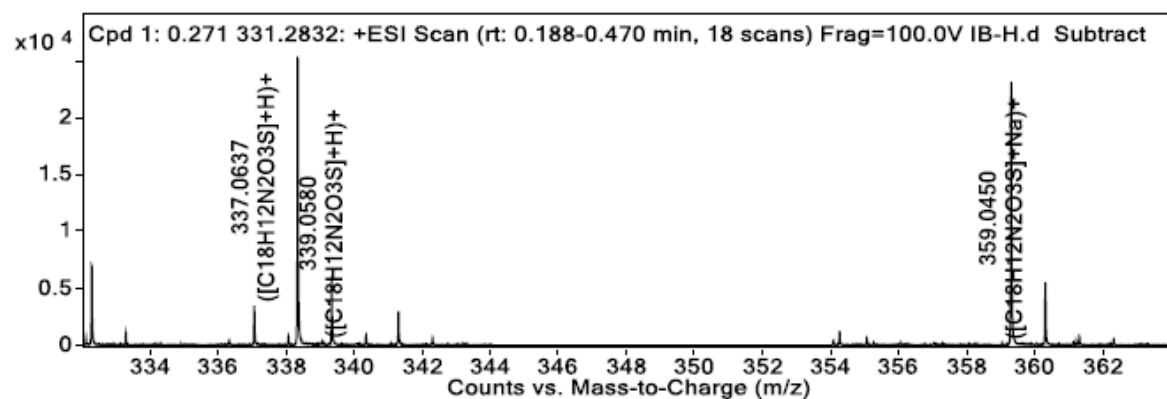

7i

May26-2020/1  
IB-Me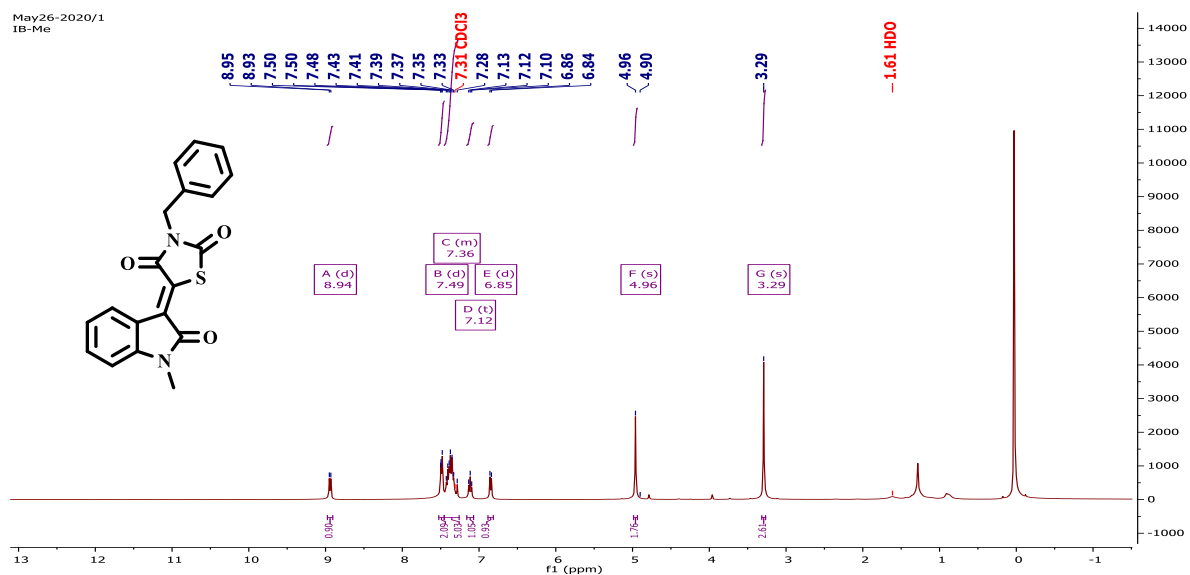May27-2020/2  
IB-ME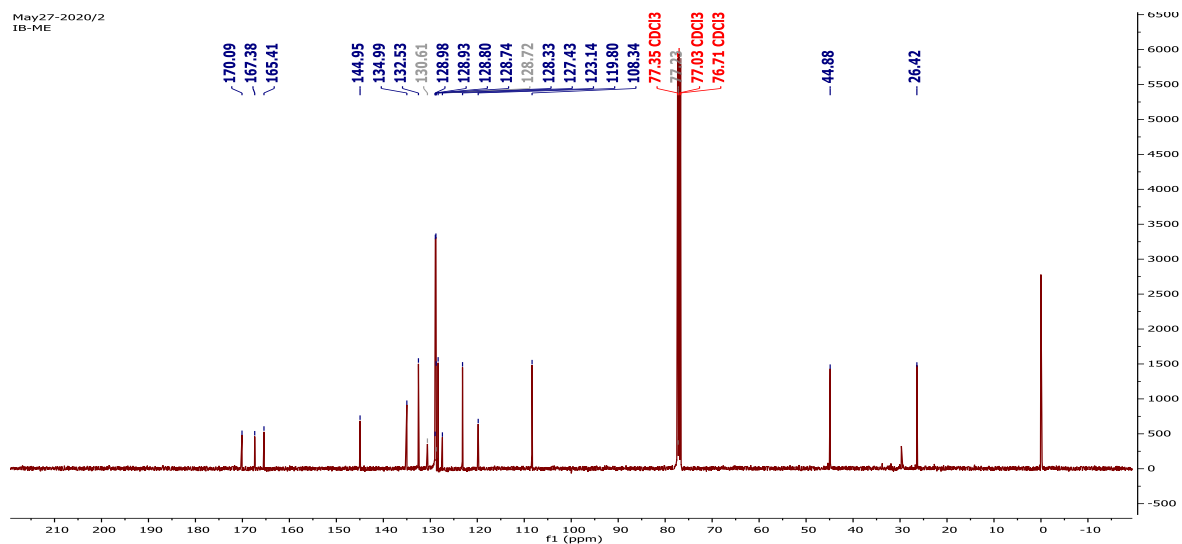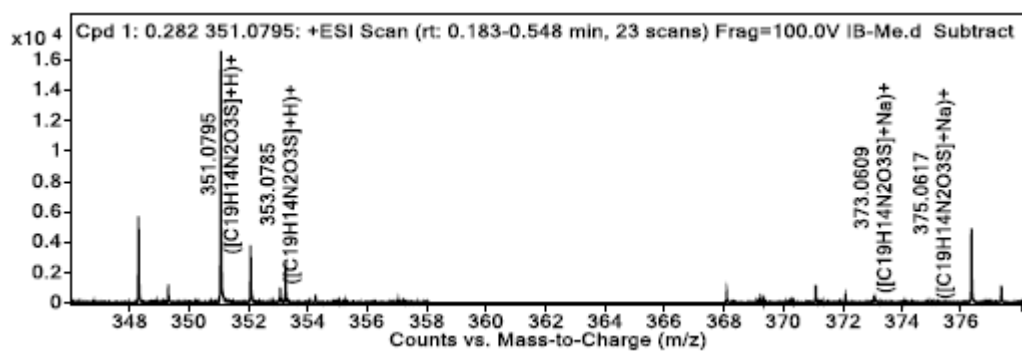

7j

May26-2020/3  
IB-ET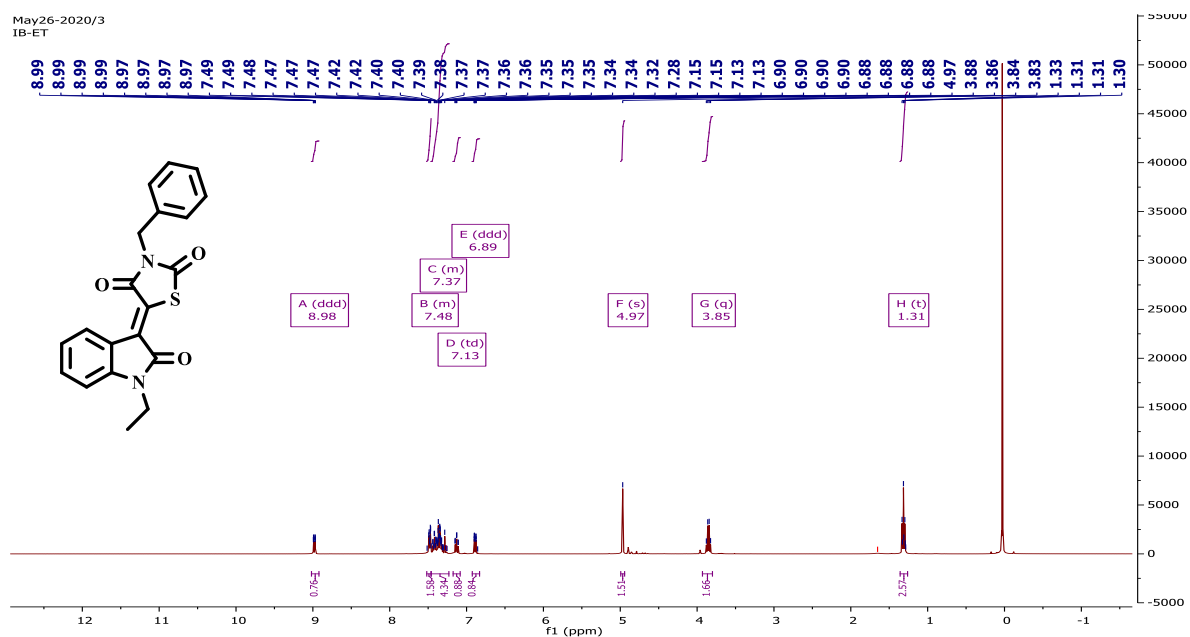May27-2020/4  
IB-ET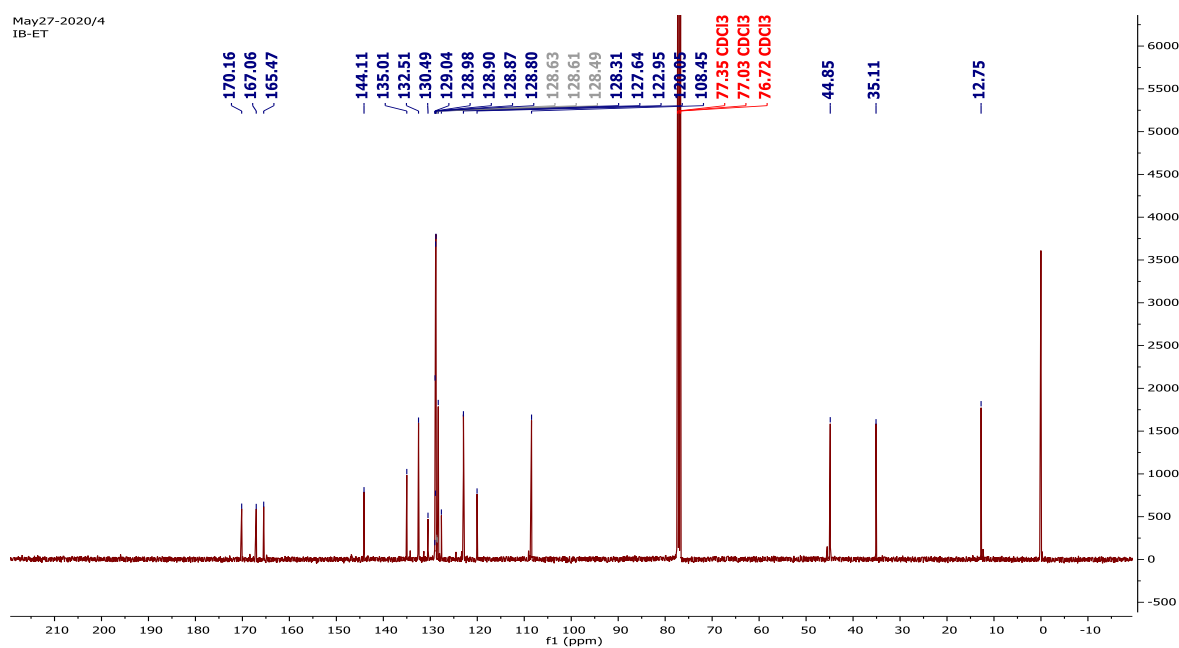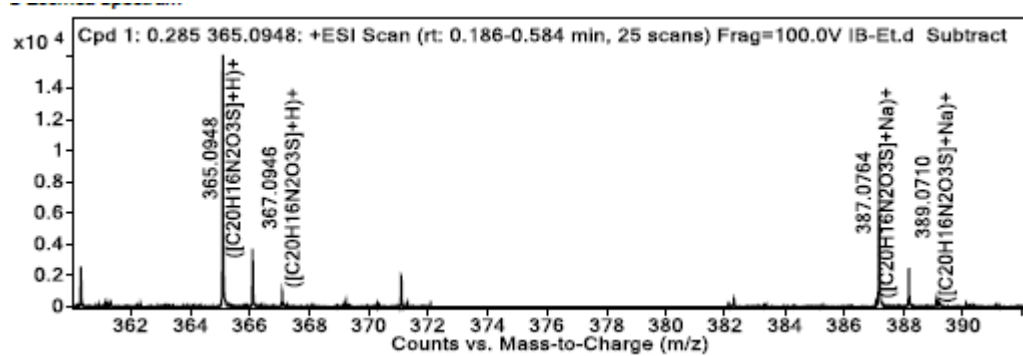

7k

Mar06-2020/1  
15A-B-T2D-B

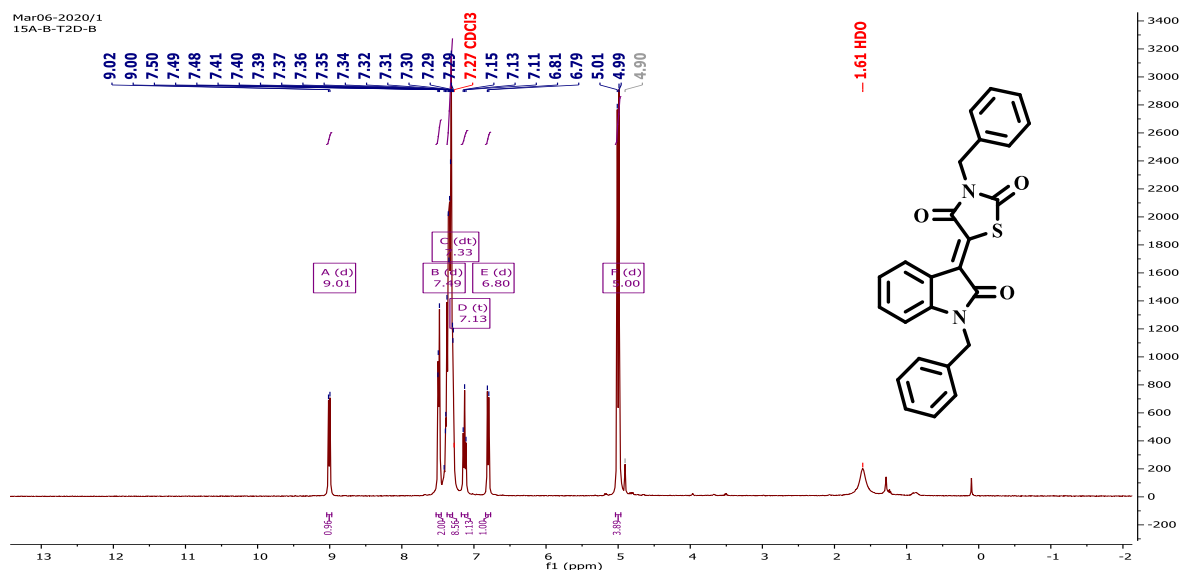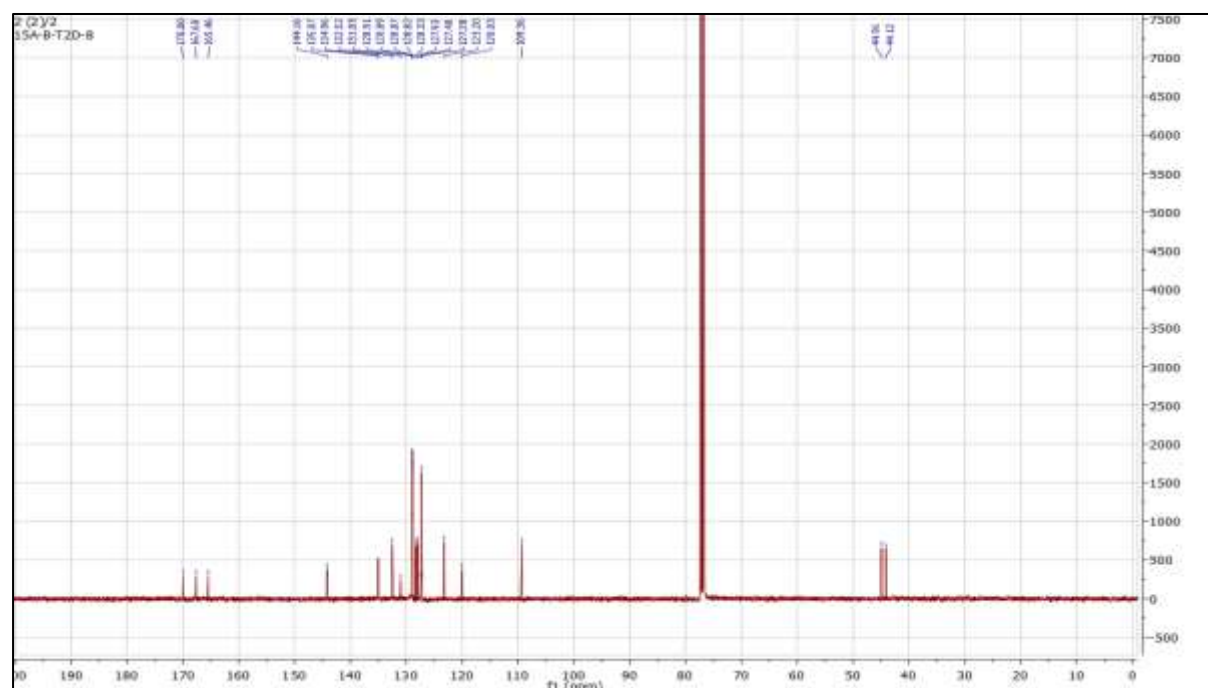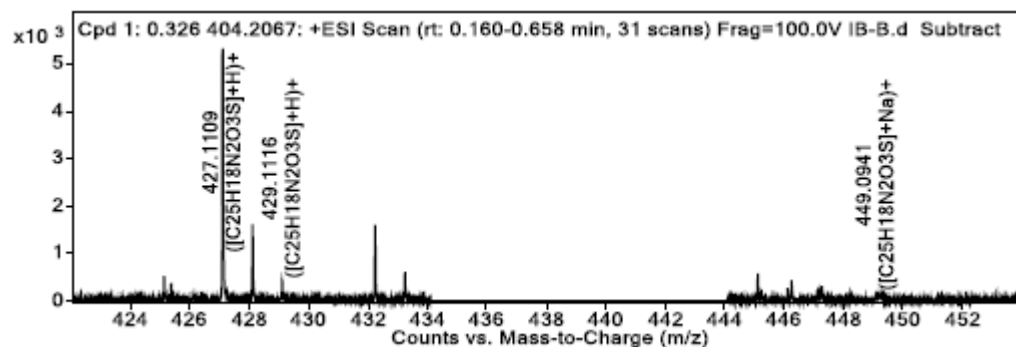

Sep01-2020/3  
ISA-B-CL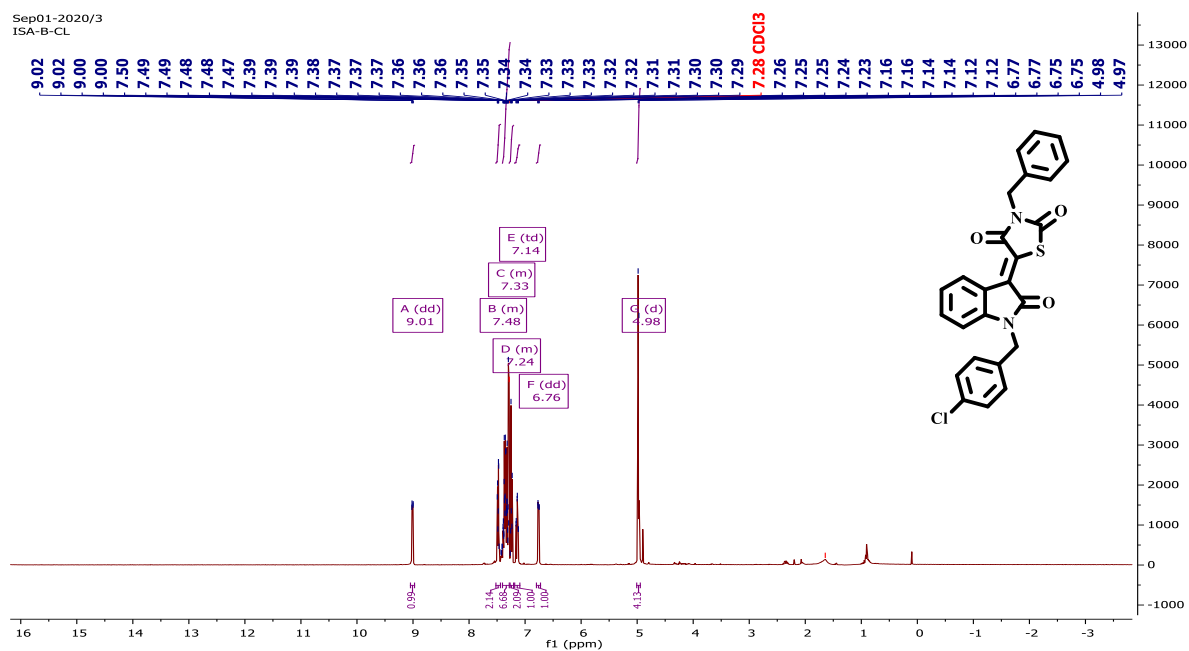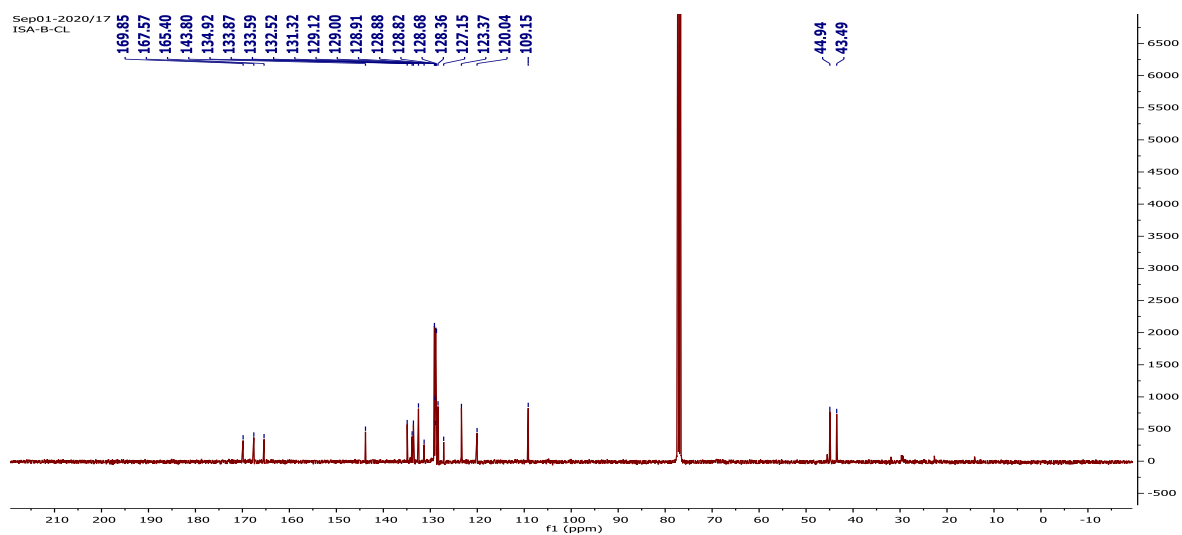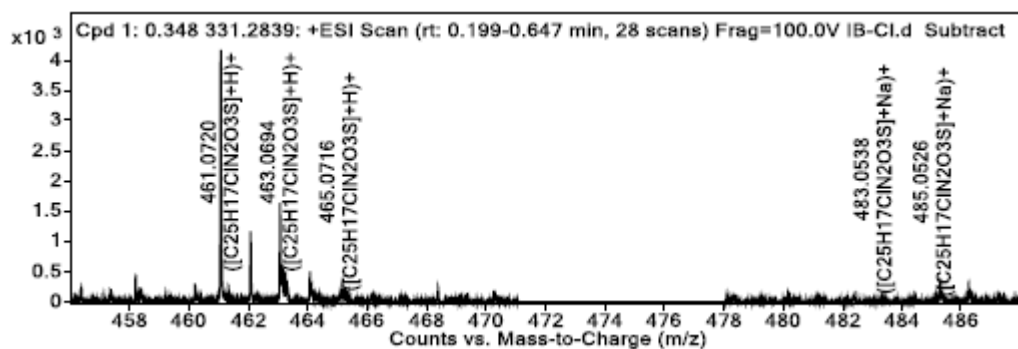

7m

Jun27-2020/5  
IB-Br

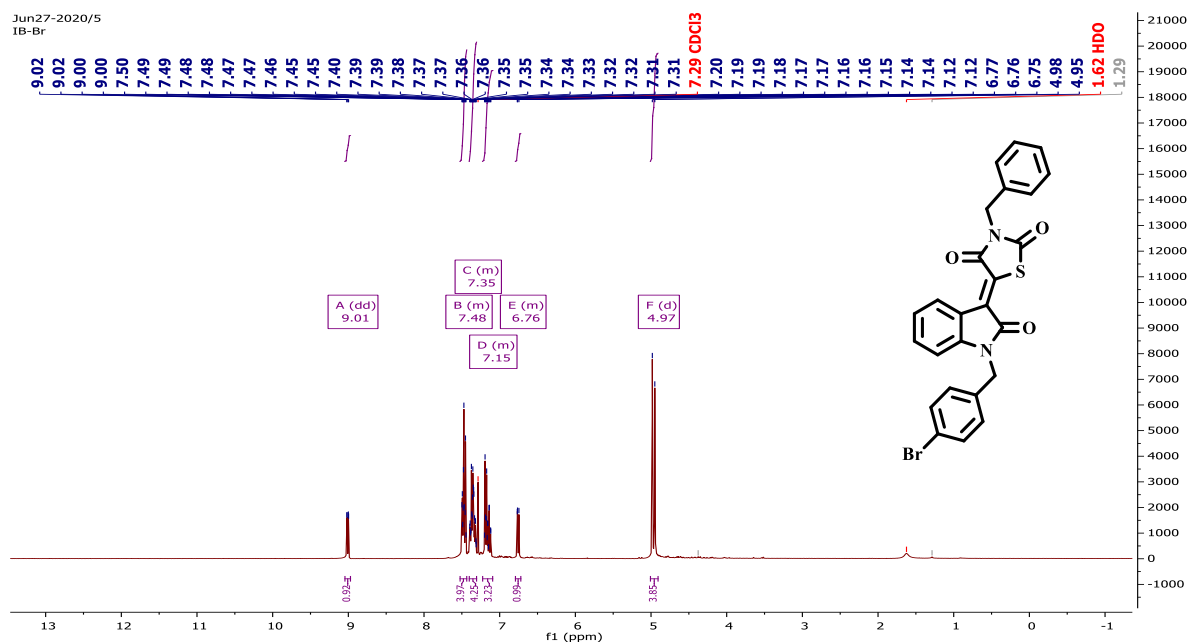

Jun27-2020/6  
IB-Br

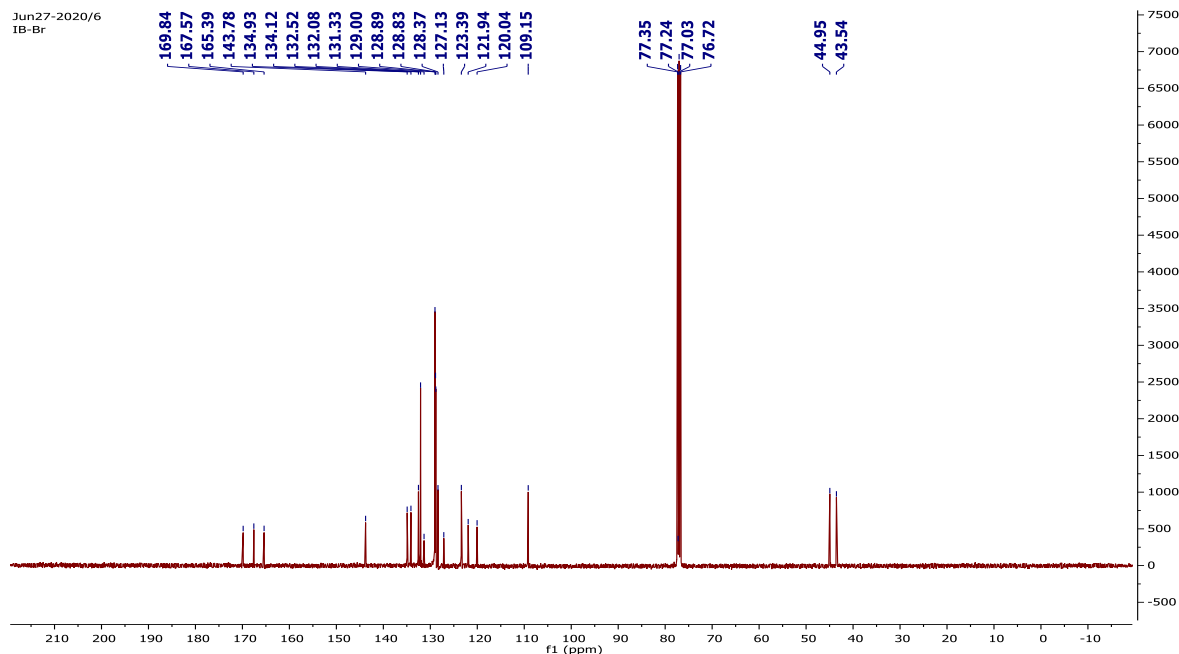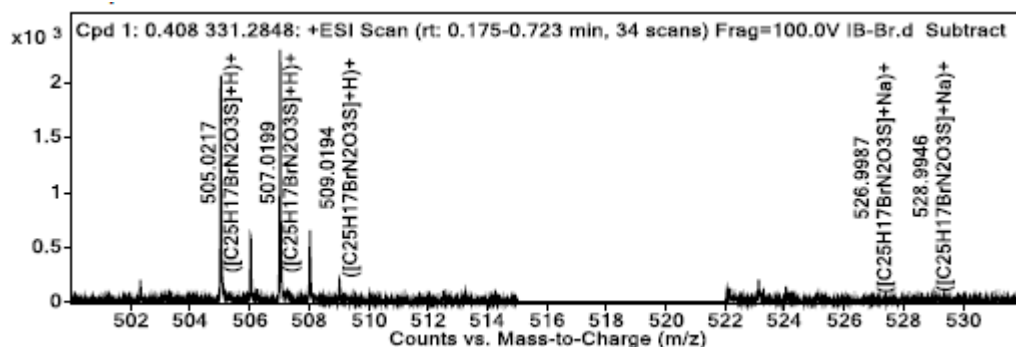

7n

May26-2020/2  
IB-N1

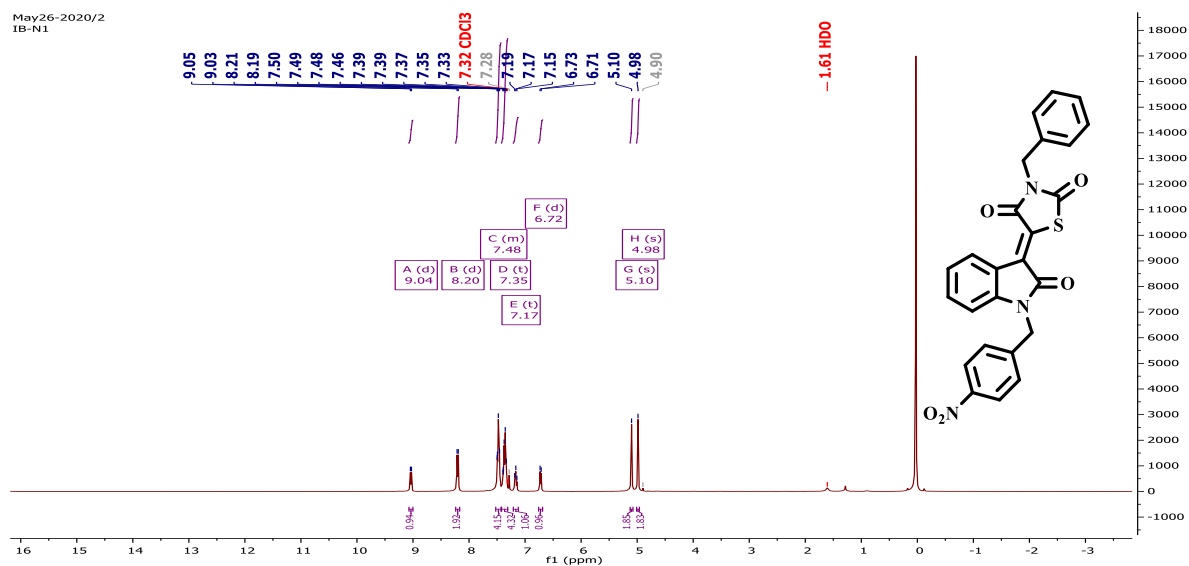

May27-2020/3  
IB-N1

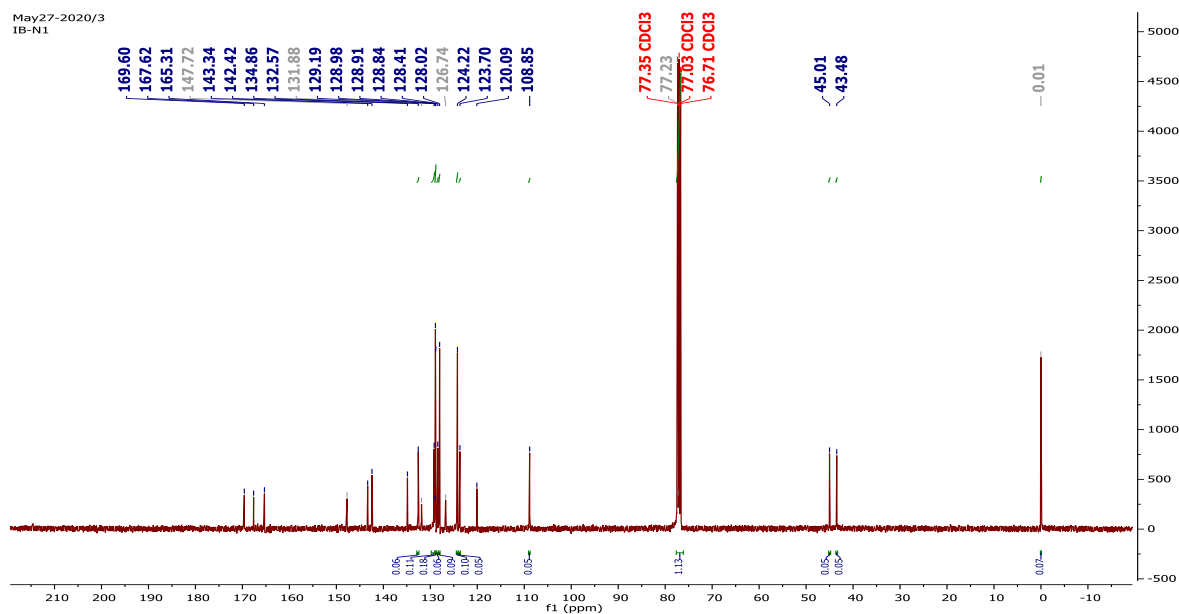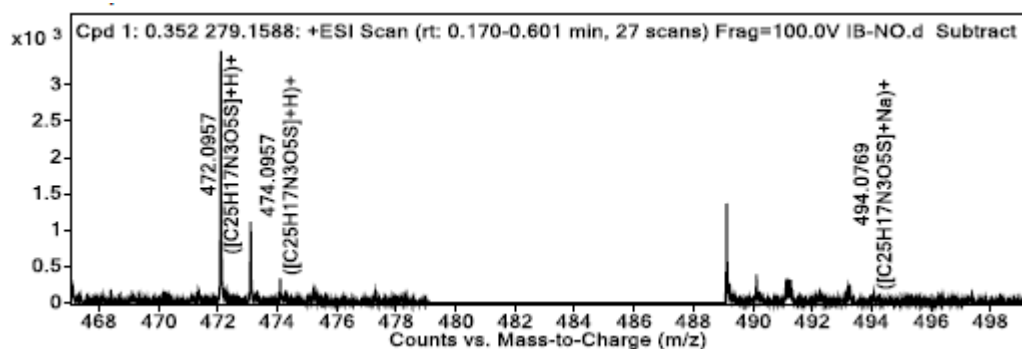

Supplement: d0nj05649a1.pdf [file d0nj05649a1.pdf]
